# Supplementary material
Source: MDPI journal article supplement (https://www.mdpi.com/2079-6412/13/1/28)
Supplement: s1 [file s1 › coatings-2073973-supplementary.pdf]

# THz Surface Plasmons in Wide and Freestanding Graphene Nanoribbon Arrays

Talia Tene <sup>1</sup>, Marco Guevara <sup>2</sup>, Yesenia Cevallos <sup>3</sup>, Miguel Ángel Sáez Paguay <sup>4</sup>, Stefano Bellucci <sup>5</sup> and Cristian Vacacela Gomez <sup>6,\*</sup>

<sup>1</sup> Department of Chemistry, Universidad Técnica Particular de Loja, Loja 110160, Ecuador; tbtene@utpl.edu.ec

<sup>2</sup> Faculty of Mechanical Engineering, Escuela Superior Politécnica de Chimborazo (ESPOCH), Riobamba 060155, Ecuador

<sup>3</sup> College of Engineering, Universidad Nacional de Chimborazo, Riobamba 060108, Ecuador;

<sup>4</sup> Facultad de Recursos Naturales, Escuela Superior Politécnica de Chimborazo (ESPOCH), Orellana 220201, Ecuador

<sup>5</sup> INFN-Laboratori Nazionali di Frascati, Via E. Fermi 54, I-00044 Frascati, RM, Italy;

<sup>6</sup> UNICARIBE Research Center, University of Calabria, I-87036 Rende, CS, Italy

\* Correspondence: cristianisaac.vacacelagomez@fis.unical.it

**Citation:** Tene, T.; Guevara, M.; Cevallos, Y.; Sáez Paguay, M.Á.; Bellucci, S.; Vacacela Gomez, C. THz Surface Plasmons in Wide and Freestanding Graphene Nanoribbon Arrays. *Coatings* **2023**, *13*, 28. <https://doi.org/10.3390/coatings13010028>

Academic Editor: Marcin Pisarek

Received: 18 November 2022

Revised: 8 December 2022

Accepted: 20 December 2022

Published: 23 December 2022

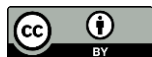

**Copyright:** © 2022 by the authors. Licensee MDPI, Basel, Switzerland. This article is an open access article distributed under the terms and conditions of the Creative Commons Attribution (CC BY) license (<https://creativecommons.org/licenses/by/4.0/>).

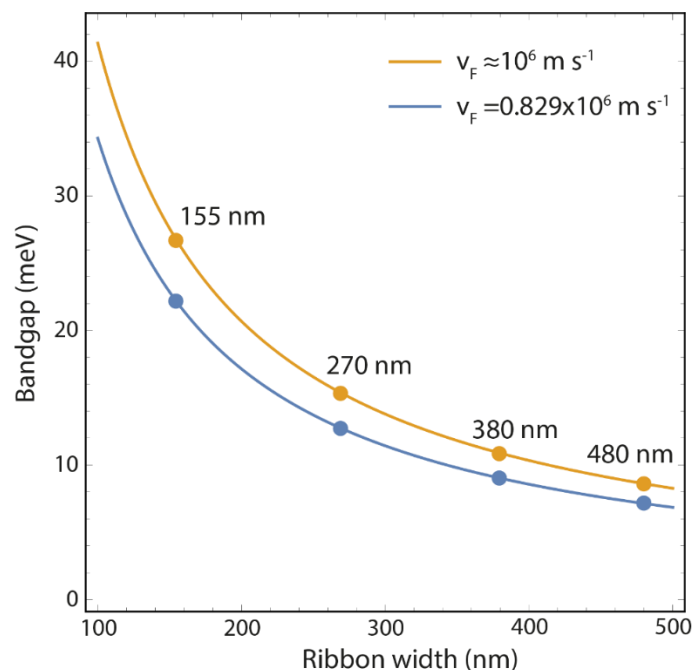

**Figure S1.** Bandgap ( $\Delta$ ) as a function of the ribbon width ( $w$ ), considering the charge carrier velocity computed by DFT-LDA ( $v_F = 0.829 \times 10^6 \text{ m/s}$ ) (Ref. [25] in the main text) and the conventional value widely used ( $v_F \approx 10^6 \text{ m/s}$ ) (Ref. [28] in the main text). Markers represent the GNR systems under study and continue lines are the fitting curve using Equation 2 (in the main text).

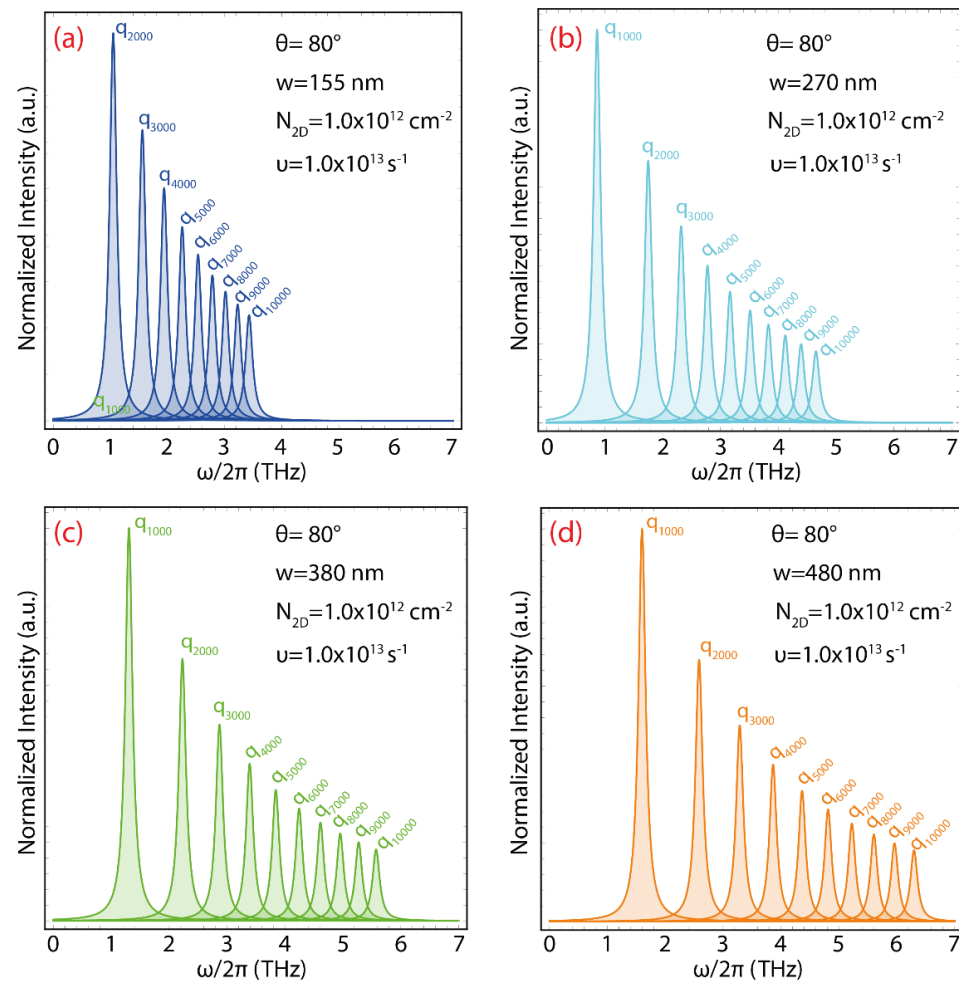

**Figure S2.** Plasmon frequency ( $\omega/2\pi \leq 7 \text{ THz}$ ) (using  $\theta = 80^\circ$ ,  $N_{2D} = 1.0 \times 10^{12} \text{ cm}^{-2}$ ,  $\nu = 1.0 \times 10^{13} \text{ s}^{-1}$ , and  $v_F = 0.829 \times 10^6 \text{ m/s}$ ) for selected  $q$  values from 1000 to 10,000  $\text{cm}^{-1}$ , with different ribbon widths: (a)  $w = 155 \text{ nm}$ , (b)  $w = 270 \text{ nm}$ , (c)  $w = 380 \text{ nm}$ , and (d)  $w = 480 \text{ nm}$ . Plasmon spectra were constructed using the Lorentz line shape function to a maximum value of 1, setting the full width at half maximum to 0.2, and the corresponding transition frequency was taken from Table 4 (in the main text) for the selected  $q$  values. A conventional exponential decay function is adopted for the dispersion of the plasmon spectra.

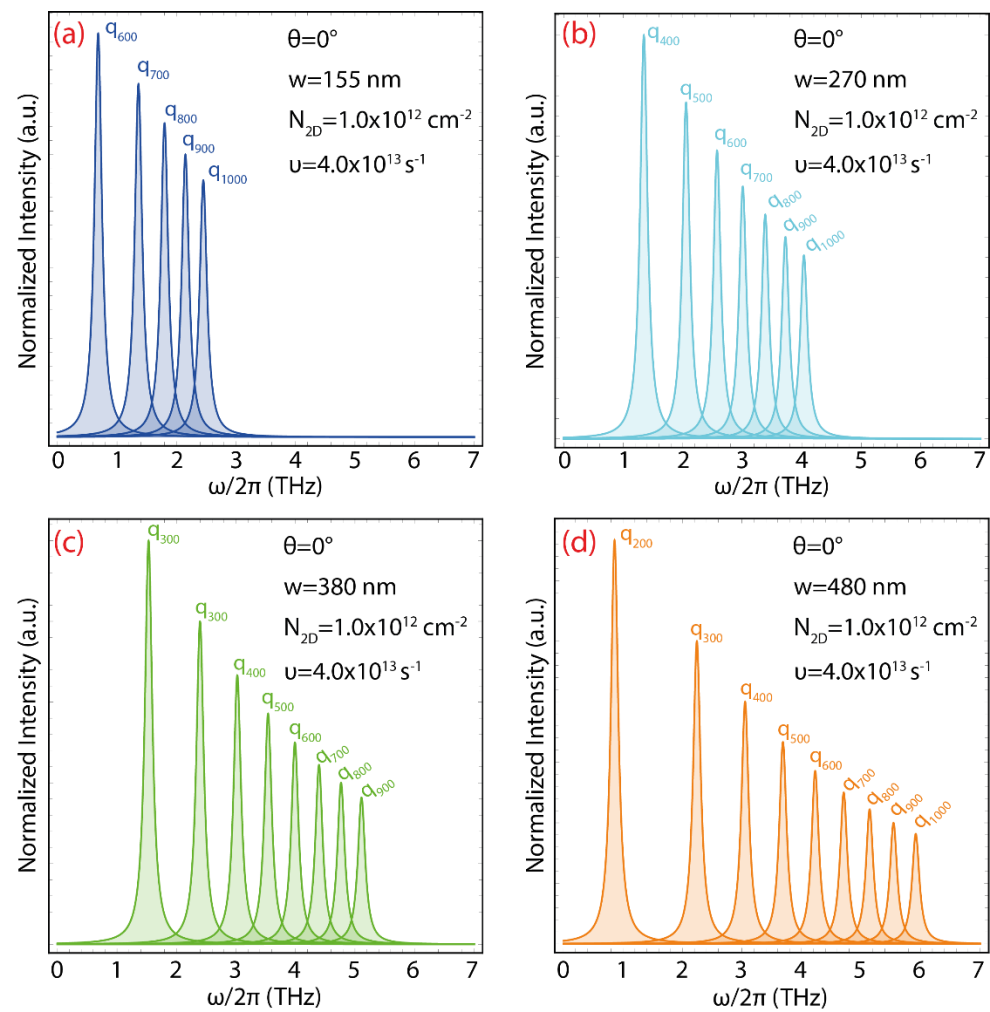

**Figure S3.** Plasmon frequency ( $\omega/2\pi \leq 7 \text{ THz}$ ) (using  $\theta = 0$ ,  $N_{2D} = 1.0 \times 10^{12} \text{ cm}^{-2}$ ,  $\nu = 4.0 \times 10^{13} \text{ s}^{-1}$ , and  $v_F = 0.829 \times 10^6 \text{ m/s}$ ) for selected  $q$  values from 100 to 1000  $\text{cm}^{-1}$ , with different ribbon widths: (a)  $w = 155 \text{ nm}$ , (b)  $w = 270 \text{ nm}$ , (c)  $w = 380 \text{ nm}$ , and (c)  $w = 480 \text{ nm}$ . Plasmon spectra were constructed using the Lorentz line shape function to a maximum value of 1, setting the full width at half maximum to 0.2, and the corresponding transition frequency was taken from Table 6 (in the main text) for the selected  $q$  values. A conventional exponential decay function is adopted for the dispersion of the plasmon spectra.

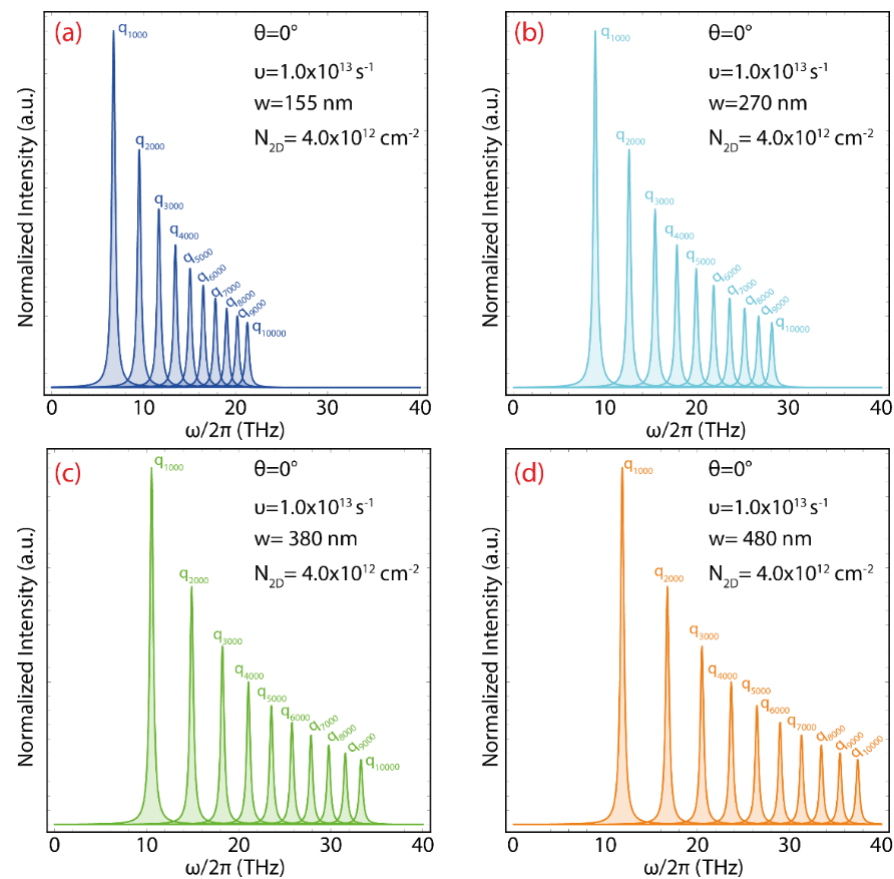

**Figure S4.** Plasmon frequency ( $\omega/2\pi \leq 40$  THz) (using  $\theta = 0$ ,  $N_{2D} = 4.0 \times 10^{12} \text{ cm}^{-2}$ ,  $\nu = 1.0 \times 10^{13} \text{ s}^{-1}$ , and  $v_F = 0.829 \times 10^6 \text{ m/s}$ ) for selected  $q$  values from 1000 to 10,000  $\text{cm}^{-1}$ , with different ribbon widths: (a)  $w = 155 \text{ nm}$ , (b)  $w = 270 \text{ nm}$ , (c)  $w = 380 \text{ nm}$ , and (c)  $w = 480 \text{ nm}$ . Plasmon spectra were constructed using the Lorentz line shape function to a maximum value of 1, setting the full width at half maximum to 0.2, and the corresponding transition frequency was taken from Table 8 (in the main text) for the selected  $q$  values. A conventional exponential decay function is adopted for the dispersion of the plasmon spectra.

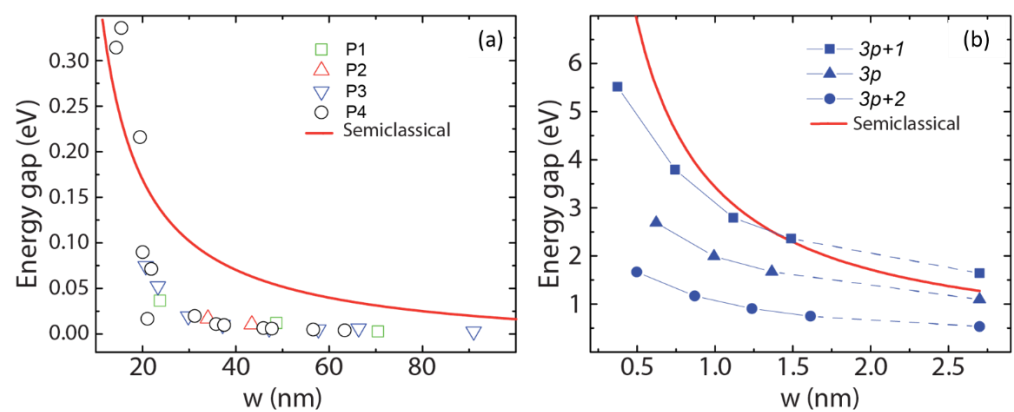

**Figure S5.** Bandgap as a function of ribbon width. (a) Experimental results for different datasets (P1-P4) and (b) GW approximation for different families of GNRs (Ref. [29] in the main text). The red line is the predicted curve using Equation (2) (in the main text).

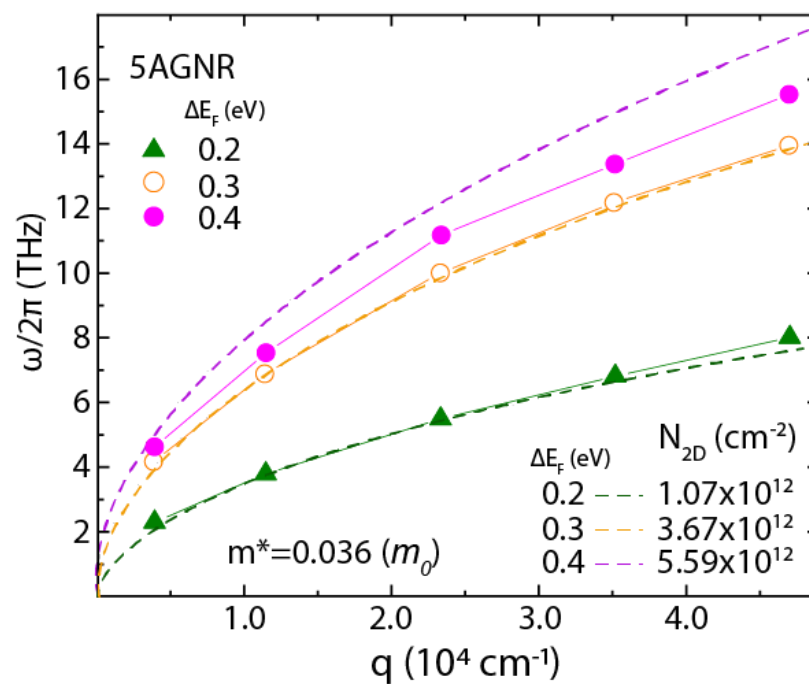

**Figure S6.** Plasmon frequency dispersion ( $\omega/2\pi$ ) vs. wave vector ( $q$ ) for five armchair graphene nanoribbon (5AGNR), considering the numerical TDDFT+RPA approach (Ref. [20] in the main text) and the predictions of the semi-analytical model through Equation (4). The input parameters of Equation (4) are given in the figure.
